# Supplementary material
Source: Research Square preprint supplement (doi:10.21203/rs.3.rs-9292563/v1)
Supplement: Supplementary file 1 [file aa9a9765838e2204d5fb3748.docx]

| **Category** | **Anlotinib monotherapy** | | **P value** |
| --- | --- | --- | --- |
| **Beva-pretreated** | **Beva-naïve** |
| **(N=108)** | **(N=174)** |
| **Age; Mean (SD)** | 61.68 (9.61) | 61.22 (11.35) | 0.914 |
| **Sex** |  |  | 0.178 |
| Male | 57 (52.78%) | 106 (60.92%) |  |
| Female | 51 (47.22%) | 68 (39.08%) |  |
| **Smoking history** |  |  | 0.351 |
| Yes | 13 (12.04%) | 15 (8.62%) |  |
| No | 95 (87.96%) | 159 (91.38%) |  |
| **Drinking history** |  |  | 0.493 |
| Yes | 7 (6.48%) | 8 (4.60%) |  |
| No | 101 (93.52%) | 166 (95.40%) |  |
| **Comorbidity** |  |  |  |
| Hypertension | 35 (32.41%) | 44 (25.29%) | 0.196 |
| Diabetes | 15 (13.89%) | 19 (10.92%) | 0.457 |
| Coronary | 3 (2.78%) | 13 (7.47%) | 0.098 |
| Hyperlipidemia | 5 (4.63%) | 21 (12.07%) | **0.036** |
| **ECOG** |  |  | 0.282 |
| 0 - 1 | 78 (72.2%) | 115 (66.1%) |  |
| 2 - 3 | 30 (27.8%) | 59 (33.9%) |  |
| **TNM stage** |  |  | 0.160 |
| Ⅲ | 19 (17.6%) | 43 (24.7%) |  |
| Ⅳ | 89 (82.4%) | 131 (75.3%) |  |
| **Treatment line** |  |  | 0.515 |
| 2 | 41 (38.0%) | 72 (41.4%) |  |
| 3 | 41 (38.0%) | 70 (40.2%) |  |
| ≥ 4 | 26 (24.1%) | 32 (18.4%) |  |

**Supplementary table 1.** Demographic and Clinical Characteristics in Patients treated with Anlotinib monotherapy before PSM.

**Supplementary table 2.** Characteristics of the Patients in the Anlotinib monotherapy and Other therapies groups.

| **Category** | **Before PSM** | | **p-value** | **After PSM** | | **P value** |
| --- | --- | --- | --- | --- | --- | --- |
| **Bevacizumab-pretreated** | | **Bevacizumab-pretreated** | |
| **Anlotinib monotherapy** | **Other therapies** | **Anlotinib monotherapy** | **Other therapies** |
| **(N=108)** | **(N=119)** | **(N=93)** | **(N=93)** |
| **Age; Mean (SD)** | 61.68 (9.61) | 61.87 (8.31) | 0.867 | 61.29 (10.07) | 60.71 (8.73) | 0.670 |
| **Sex** |  |  | **0.018** |  |  | 0.231 |
| Male | 57 (52.78%) | 81 (68.07%) |  | 52 (55.91%) | 60 (64.52%) |  |
| Female | 51 (47.22%) | 38 (31.93%) |  | 41 (44.09%) | 33 (35.48%) |  |
| **Smoking history** |  |  | **<0.001** |  |  | **0.003** |
| Yes | 13 (12.04%) | 41 (34.45%) |  | 13 (13.98%) | 30 (32.26%) |  |
| No | 95 (87.96%) | 78 (65.55%) |  | 80 (86.02%) | 63 (67.74%) |  |
| **Drinking history** |  |  | **0.003** |  |  | **0.018** |
| Yes | 7 (6.48%) | 24 (20.17%) |  | 7 (7.53%) | 18 (19.35%) |  |
| No | 101 (93.52%) | 95 (79.83%) |  | 86 (92.47%) | 75 (80.65%) |  |
| **Comorbidity** |  |  |  |  |  |  |
| Hypertension | 35 (32.41%) | 47 (39.50%) | 0.267 | 32 (34.41%) | 38 (40.86%) | 0.364 |
| Diabetes | 15 (13.89%) | 18 (15.13%) | 0.792 | 13 (13.98%) | 15 (16.13%) | 0.682 |
| Coronary | 3 (2.78%) | 3 (2.52%) | 1.000 | 3 (3.23%) | 3 (3.23%) | 1.000 |
| Hyperlipidemia | 5 (4.63%) | 16 (13.45%) | **0.022** | 5 (5.38%) | 15 (16.13%) | **0.018** |
| **ECOG** |  |  | 0.661 |  |  | 0.508 |
| 0 - 1 | 78 (72.2%) | 89 (74.8%) |  | 66 (71.0%) | 70 (75.3%) |  |
| 2 - 3 | 30 (27.8%) | 30 (25.2%) |  | 27 (29.0%) | 23 (24.7%) |  |
| **TNM stage** |  |  | 0.737 |  |  | 0.565 |
| Ⅲ | 19 (17.6%) | 23 (19.3%) |  | 15 (16.1%) | 18 (19.4%) |  |
| Ⅳ | 89 (82.4%) | 96 (80.7%) |  | 78 (83.9%) | 75 (80.6%) |  |
| **Treatment line** |  |  | **0.003** |  |  | 0.798 |
| 2 | 41 (38.0%) | 66 (55.5%) |  | 40 (43.0%) | 42 (45.2%) |  |
| 3 | 41 (38.0%) | 42 (35.3%) |  | 40 (43.0%) | 41 (44.1%) |  |
| ≥ 4 | 26 (24.1%) | 11 (9.2%) |  | 13 (14.0%) | 10 (10.8%) |  |

**Supplementary table 3.** Characteristics of the Patients in the Anlotinib combination and Other therapies groups.

| **Category** | **Before PSM** | | **P value** | **After PSM** | | **P value** |
| --- | --- | --- | --- | --- | --- | --- |
| **Bevacizumab-pretreated** | | **Bevacizumab-pretreated** | |
| **Anlotinib combination** | **Other therapies** | **Anlotinib combination** | **Other therapies** |
| **(N=345)** | **(N=119)** | **(N=297)** | **(N=99)** |
| **Age; Mean (SD)** | 59.54 (10.64) | 61.87 (8.31) | 0.064 | 59.76 (10.63) | 61.00 (8.39) | 0.518 |
| **Sex** |  |  | 0.338 |  |  | 0.463 |
| Male | 218 (63.19%) | 81 (68.07%) |  | 192 (64.65%) | 68 (68.69%) |  |
| Female | 127 (36.81%) | 38 (31.93%) |  | 105 (35.35%) | 31 (31.31%) |  |
| **Smoking history** |  |  | 0.488 |  |  | 0.240 |
| Yes | 107 (31.01%) | 41 (34.45%) |  | 92 (30.98%) | 37 (37.37%) |  |
| No | 238 (68.99%) | 78 (65.55%) |  | 205 (69.02%) | 62 (62.63%) |  |
| **Drinking history** |  |  | 0.408 |  |  | 0.287 |
| Yes | 58 (16.81%) | 24 (20.17%) |  | 49 (16.50%) | 21 (21.21%) |  |
| No | 287 (83.19%) | 95 (79.83%) |  | 248 (83.50%) | 78 (78.79%) |  |
| **Comorbidity** |  |  |  |  |  |  |
| Hypertension | 144 (41.74%) | 47 (39.50%) | 0.668 | 127 (42.76%) | 39 (39.39%) | 0.557 |
| Diabetes | 51 (14.78%) | 18 (15.13%) | 0.928 | 44 (14.81%) | 16 (16.16%) | 0.746 |
| Coronary | 23 (6.67%) | 3 (2.52%) | 0.090 | 18 (6.06%) | 2 (2.02%) | 0.112 |
| Hyperlipidemia | 43 (12.46%) | 16 (13.45%) | 0.782 | 34 (11.45%) | 15 (15.15%) | 0.332 |
| **ECOG** |  |  | 0.608 |  |  | 0.279 |
| 0 - 1 | 266 (77.1%) | 89 (74.8%) |  | 229 (77.1%) | 71 (71.7%) |  |
| 2 - 3 | 79 (22.9%) | 30 (25.2%) |  | 68 (22.9%) | 28 (28.3%) |  |
| **TNM stage** |  |  | 0.214 |  |  | 0.190 |
| Ⅲ | 86 (24.9%) | 23 (19.3%) |  | 73 (24.6%) | 18 (18.2%) |  |
| Ⅳ | 259 (75.1%) | 96 (80.7%) |  | 224 (75.4%) | 81 (81.8%) |  |
| **Treatment line** |  |  | **0.046** |  |  | 0.402 |
| 2 | 150 (43.5%) | 66 (55.5%) |  | 140 (47.1%) | 50 (50.5%) |  |
| 3 | 140 (40.6%) | 42 (35.3%) |  | 118 (39.7%) | 41 (41.4%) |  |
| ≥ 4 | 55 (15.9%) | 11 (9.2%) |  | 39 (13.1%) | 8 (8.1%) |  |
